# Supplementary material for: Social Contact Structures and Time Use Patterns in the Manicaland Province of Zimbabwe
Source: PubMed Central journal article supplement (PMC5242544; doi:10.1371/journal.pone.0170459), 2017-01-18
Supplement: pone.0170459.s003.pdf [file pone.0170459.s003.pdf]

**Exit Interview – To be filled in by researcher**

**CONTACT DIARY**

*For persons aged 6 years and above*

|           |                                                                                                       |                                     |                                    |
|-----------|-------------------------------------------------------------------------------------------------------|-------------------------------------|------------------------------------|
| <b>Q1</b> | Did you have a day-off from school/work on the two assigned days?                                     | 1° day—Yes <input type="checkbox"/> | 1° day—No <input type="checkbox"/> |
|           |                                                                                                       | 2° day—Yes <input type="checkbox"/> | 2° day—No <input type="checkbox"/> |
| <b>Q2</b> | Did you stay at home because you were ill during the assigned days?                                   | 1° day—Yes <input type="checkbox"/> | 1° day—No <input type="checkbox"/> |
|           |                                                                                                       | 2° day—Yes <input type="checkbox"/> | 2° day—No <input type="checkbox"/> |
| <b>Q3</b> | Did you have any difficulties filling in the diary? If YES, please explain the difficulties.          | Yes <input type="checkbox"/>        | No <input type="checkbox"/>        |
|           | .....                                                                                                 |                                     |                                    |
|           | .....                                                                                                 |                                     |                                    |
| <b>Q4</b> | Did you record <b>all</b> the contacts you had during the period allocated? If NO, explain why.       | Yes <input type="checkbox"/>        | No <input type="checkbox"/>        |
|           | .....                                                                                                 |                                     |                                    |
|           | .....                                                                                                 |                                     |                                    |
| <b>Q5</b> | Do you think that the diary changed how you or those around you normally behave? If YES, explain why. | Yes <input type="checkbox"/>        | No <input type="checkbox"/>        |
|           | .....                                                                                                 |                                     |                                    |
|           | .....                                                                                                 |                                     |                                    |
| <b>Q6</b> | Please estimate the age of the person in photographs 1, 2 and 3.                                      | 1) <input type="checkbox"/>         | Check <input type="checkbox"/>     |
|           |                                                                                                       | 2) <input type="checkbox"/>         | Check <input type="checkbox"/>     |
|           |                                                                                                       | 3) <input type="checkbox"/>         | Check <input type="checkbox"/>     |

| STUDY DETAILS |                                                 |                                                          |                                    |
|---------------|-------------------------------------------------|----------------------------------------------------------|------------------------------------|
| <b>Q01</b>    | ID study participant                            | Site <input type="text"/>                                |                                    |
|               |                                                 | Household <input type="text"/>                           |                                    |
|               |                                                 | Line <input type="text"/>                                |                                    |
| <b>Q02</b>    | Allocated days of the week to fill in the diary | <input type="text" value="MON/TUE/WED/THU/FRI/SAT/SUN"/> |                                    |
| <b>Q03</b>    | Allocated dates to fill in the diary            | <input type="text" value="DD1-DD2/MM/YYYY"/>             |                                    |
| <b>Q04</b>    | Person keeping the diary                        | Participant <input type="checkbox"/>                     |                                    |
|               |                                                 | Shadow(s) <input type="checkbox"/>                       | N° of shadows <input type="text"/> |
| <b>Q05</b>    | Age group participant                           | <input type="text"/>                                     |                                    |

Human diseases are spread through various ways.

One way that some of these infections spread is through coming into contact with infected saliva or mucous released into the air or deposited on hard surfaces through coughing or sneezing.

For us to know exactly how these diseases may spread in the community, we need to know how people of similar or different ages mix as they perform their daily duties.

This diary will enable us to collect data on how people mix in the household and community, and help to understand how to plan for preventive and control measures against the spread of infections.

Thank you for your participation.  
 For further questions and comments, kindly contact:  
 Biomedical Research & Training Institute  
 Manicaland HIV/STD Prevention Project  
 Sarupinda Village  
 Mutasa DC  
 Tel: 028 2230

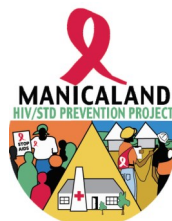

| Diary Checked by:    | Initials | Data checked | Signature |
|----------------------|----------|--------------|-----------|
| Community Researcher |          |              |           |
| Team Leader          |          |              |           |













**DURING DAY 1, WHERE DID YOU SPEND YOUR TIME?**

*In this part of the questionnaire, we ask you to report the various settings where you have been during day 1 of the two assigned days and the number of people present in that setting.*

*If in a certain time slot you have been in different settings, tick a box for each of the settings that apply.*

**DURING DAY 2, WHERE DID YOU SPEND YOUR TIME?**

*"At home" means the residence where you normally live. If you spent time in someone else's home the "Other" setting category applies.*

*"At work" can either mean at your workplace or throughout the course of your daily job activity (such as meeting customers or clients).*

*"Other" refers to settings different from "at home", "at school", and "at work" (eg. general community, transportation, leisure, church, market, etc).*

*For each of the settings you have been in, report the **number of people present around you at that time**. If this is difficult, please provide an estimate.*

**DAY 1**

| Time slots                     | Where were you at that time? |           |         |                    |                                           |                                          |                      | How many people were present around you at that time, including yourself? |           |         |       |
|--------------------------------|------------------------------|-----------|---------|--------------------|-------------------------------------------|------------------------------------------|----------------------|---------------------------------------------------------------------------|-----------|---------|-------|
|                                | At home                      | At school | At work | Other              |                                           |                                          |                      | At home                                                                   | At school | At work | Other |
|                                |                              |           |         | Within the Village | Within the Village, outside the homestead | Within the District, outside the Village | Outside the District |                                                                           |           |         |       |
| Dawn (approx. 04:00-05:00)     |                              |           |         |                    |                                           |                                          |                      |                                                                           |           |         |       |
| Twilight (approx. 5:00-06:00)  |                              |           |         |                    |                                           |                                          |                      |                                                                           |           |         |       |
| Sunrise (approx. 6:00-7:00)    |                              |           |         |                    |                                           |                                          |                      |                                                                           |           |         |       |
| Early morning (7:00-10:00)     |                              |           |         |                    |                                           |                                          |                      |                                                                           |           |         |       |
| Late morning (10:00-12:00)     |                              |           |         |                    |                                           |                                          |                      |                                                                           |           |         |       |
| Midday/Lunch (12:00-14:00)     |                              |           |         |                    |                                           |                                          |                      |                                                                           |           |         |       |
| Early afternoon (14:00-16:00)  |                              |           |         |                    |                                           |                                          |                      |                                                                           |           |         |       |
| Late afternoon (16:00-17:00)   |                              |           |         |                    |                                           |                                          |                      |                                                                           |           |         |       |
| Sunset (approx. 17:00-18:00)   |                              |           |         |                    |                                           |                                          |                      |                                                                           |           |         |       |
| Twilight (approx. 18:00-19:00) |                              |           |         |                    |                                           |                                          |                      |                                                                           |           |         |       |
| Dusk (approx. 19:00-20:00)     |                              |           |         |                    |                                           |                                          |                      |                                                                           |           |         |       |
| Early night (20:00-0:00)       |                              |           |         |                    |                                           |                                          |                      |                                                                           |           |         |       |
| Late night (0:00-4:00)         |                              |           |         |                    |                                           |                                          |                      |                                                                           |           |         |       |



**DURING DAY 2, WHERE DID YOU SPEND YOUR TIME?**

**DURING DAY 1, WHERE DID YOU SPEND YOUR TIME?**

*In this part of the questionnaire, we ask you to report the various settings where you have been during day 2 of the two assigned days and the number of people present in that setting.*

*If in a certain time slot you have been in different settings, tick a box for each of the settings that apply.*

*"At home" means the residence where you normally live. If you spent time in someone else's home the "Other" setting category applies.*

*"At work" can either mean at your workplace or throughout the course of your daily job activity (such as meeting customers or clients).*

*"Other" refers to settings different from "at home", "at school", and "at work" (eg. general community, transportation, leisure, church, market, etc).*

*For each of the settings you have been in, report the **number of people present around you at that time**. If this is difficult, please provide an estimate.*

**DAY 2**

| Time slots                     | Where were you at that time? |           |         |                    |                                      |                                       |                      | How many people were present around you at that time, including yourself? |           |         |       |
|--------------------------------|------------------------------|-----------|---------|--------------------|--------------------------------------|---------------------------------------|----------------------|---------------------------------------------------------------------------|-----------|---------|-------|
|                                | At home                      | At school | At work | Other              |                                      |                                       |                      | At home                                                                   | At school | At work | Other |
|                                |                              |           |         | Within the Village | Within the Ward, outside the Village | Within the District, outside the Ward | Outside the District |                                                                           |           |         |       |
| Dawn (approx. 04:00-05:00)     |                              |           |         |                    |                                      |                                       |                      |                                                                           |           |         |       |
| Twilight (approx. 5:00-06:00)  |                              |           |         |                    |                                      |                                       |                      |                                                                           |           |         |       |
| Sunrise (approx. 6:00-7:00)    |                              |           |         |                    |                                      |                                       |                      |                                                                           |           |         |       |
| Early morning (7:00-10:00)     |                              |           |         |                    |                                      |                                       |                      |                                                                           |           |         |       |
| Late morning (10:00-12:00)     |                              |           |         |                    |                                      |                                       |                      |                                                                           |           |         |       |
| Midday/Lunch (12:00-14:00)     |                              |           |         |                    |                                      |                                       |                      |                                                                           |           |         |       |
| Early afternoon (14:00-16:00)  |                              |           |         |                    |                                      |                                       |                      |                                                                           |           |         |       |
| Late afternoon (16:00-17:00)   |                              |           |         |                    |                                      |                                       |                      |                                                                           |           |         |       |
| Sunset (approx. 17:00-18:00)   |                              |           |         |                    |                                      |                                       |                      |                                                                           |           |         |       |
| Twilight (approx. 18:00-19:00) |                              |           |         |                    |                                      |                                       |                      |                                                                           |           |         |       |
| Dusk (approx. 19:00-20:00)     |                              |           |         |                    |                                      |                                       |                      |                                                                           |           |         |       |
| Early night (20:00-0:00)       |                              |           |         |                    |                                      |                                       |                      |                                                                           |           |         |       |
| Late night (0:00-4:00)         |                              |           |         |                    |                                      |                                       |                      |                                                                           |           |         |       |
